# Supplementary material for: Acceptability and Preliminary Efficacy of a Web- and Telephone-Based Personalised Exercise Intervention for Individuals with Metastatic Prostate Cancer: The ExerciseGuide Pilot Randomised Controlled Trial
Source: MDPI journal article supplement (doi:10.3390/cancers13235925), 2021-11-25
Supplement: s1 [file s1]

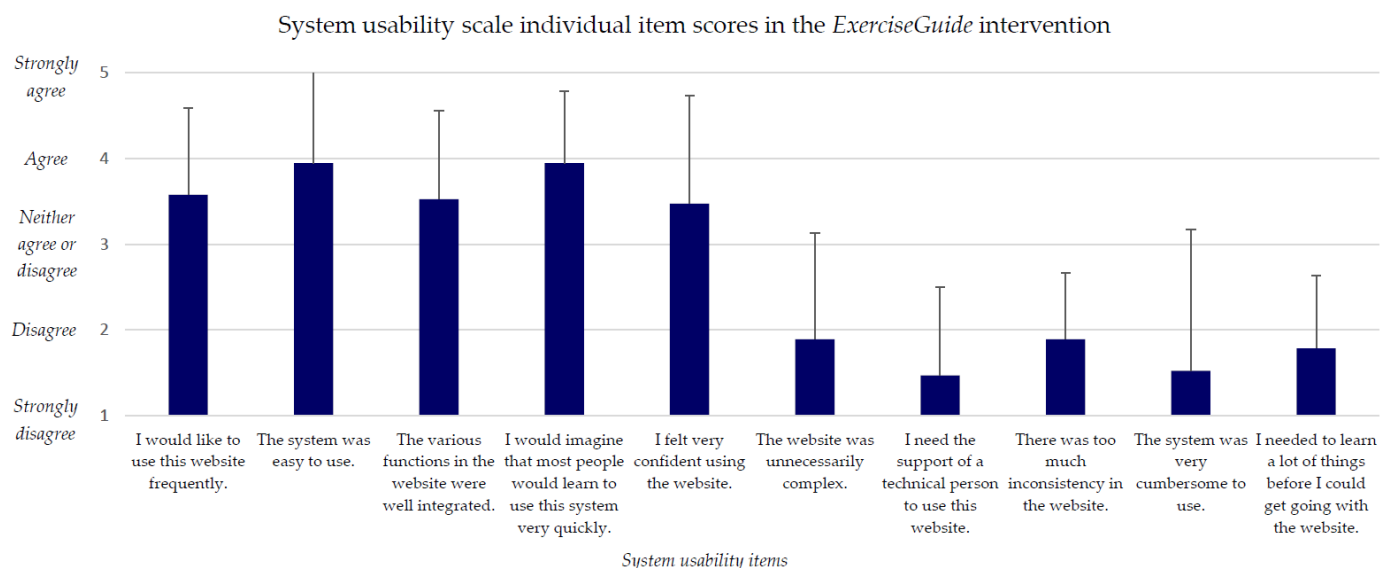

**Figure S1.** System usability scores in the *ExerciseGuide* intervention.

**Table S1.** Written positive qualitative feedback from *ExerciseGuide* intervention.

| Theme           | Participant quotes                                                                                                                                                                                                                                                                                                                                                                                                                                                                                                                                                                                                                                                                                                          |
|-----------------|-----------------------------------------------------------------------------------------------------------------------------------------------------------------------------------------------------------------------------------------------------------------------------------------------------------------------------------------------------------------------------------------------------------------------------------------------------------------------------------------------------------------------------------------------------------------------------------------------------------------------------------------------------------------------------------------------------------------------------|
| Support         | <p>Having the AEP available allowed me to adjust the program as I progressed (EG01).</p> <p>Someone available for support (EG11).</p> <p>Regular contact from the exercise team (EG15).</p> <p>The online face-to-face consultation was very good, plus the flexibility to adjust the program (EG30).</p> <p>The interactive contact by the exercise physiologist (EG33).</p> <p>Having a qualified physiologist who is enthused about the programme is a great asset (EG39).</p> <p>Getting to do some exercise instruction at home with backup (EG40).</p> <p>Provided (guilt) motivation. Helped me transition from inactive (EG47).</p> <p>Helpful from a support viewpoint, encouraging to still be active (EG53).</p> |
| Focus/structure | <p>Made me focus on helping myself to achieve better wellbeing both physical and mentally (EG11).</p> <p>The program is very structured, there is lots of information on how and why to exercise (EG20).</p> <p>Program give you something to look forward to and you can set goals (EG37).</p> <p>Got me out of the chair with definite plan in mind (EG50).</p> <p>The program was very relevant and easy to follow (EG55).</p> <p>Very precise and straightforward (EG11).</p>                                                                                                                                                                                                                                           |
| Instruction     | <p>The exercises and stretching modules clearly explained with a video to negate any doubts (EG39).</p> <p>Good structure, clear instructions on how to complete the exercises (EG48).</p>                                                                                                                                                                                                                                                                                                                                                                                                                                                                                                                                  |
| Equipment       | <p>Easy to use and versatile bands (EG10).</p>                                                                                                                                                                                                                                                                                                                                                                                                                                                                                                                                                                                                                                                                              |
| Tailoring       | <p>Having a tailored program that allowed me to vary my effort when I needed to (EG01).</p>                                                                                                                                                                                                                                                                                                                                                                                                                                                                                                                                                                                                                                 |
| Tracking        | <p>Booklet to keep track of exercises (EG15).</p>                                                                                                                                                                                                                                                                                                                                                                                                                                                                                                                                                                                                                                                                           |
| Other           | <p>All exercise is good. I suppose (EG13).</p> <p>I really can't comment as my participation has been nothing short of dismal (EG29).</p> <p>A fantastic program and very beneficial. I lost weight and felt a lot better both mentally and physically and mentally and this was during the first outbreak of Covid19 and lockdown and a very traumatic time due to major family issues (EG01).</p> <p>I cannot say enough about this program, brilliant work putting it together (EG01).</p>                                                                                                                                                                                                                               |

**Table S2.** Written constructive qualitative feedback from *ExerciseGuide* intervention.

| Theme                                    | Participant quotes                                                                                                                                                                           |
|------------------------------------------|----------------------------------------------------------------------------------------------------------------------------------------------------------------------------------------------|
| Lack of variety in exercise prescription | <p>Exercise program lacks motivation. Is the same old set of exercises that have been known to be difficult to maintain for decades (EG13).</p> <p>Only one program of exercises (EG10).</p> |

|                                                      |                                                                                                                                                                                                                                                                                                                                                                                                                                                                                                                                                                                                                                                                                                                            |
|------------------------------------------------------|----------------------------------------------------------------------------------------------------------------------------------------------------------------------------------------------------------------------------------------------------------------------------------------------------------------------------------------------------------------------------------------------------------------------------------------------------------------------------------------------------------------------------------------------------------------------------------------------------------------------------------------------------------------------------------------------------------------------------|
|                                                      | The resistance program became boring (EG30).<br>Not enough variety (EG40).                                                                                                                                                                                                                                                                                                                                                                                                                                                                                                                                                                                                                                                 |
| Navigation and usability issues                      | The website was difficult to navigate unless you have IT experience (EG15).<br>It wasn't always clear when to do which parts. So, for example I thought it was sequential so didn't start the later modules until I had virtually finished the 8 weeks. A 'roadmap' to navigate the program might help (EG20).<br>I got mixed up between no of repetitions and number of sessions per week early on but that's probably because I 'didn't read the instructions' properly (EG50).                                                                                                                                                                                                                                          |
| Information about why certain exercises pre-scribed. | Could not feel any benefit in one of the exercises (Leg Fallout) and could not find any reason why this was so on the web site (EG39).<br>Not always clear why exercises were suggested (EG48).                                                                                                                                                                                                                                                                                                                                                                                                                                                                                                                            |
| Adherence issues                                     | I started the program during chemotherapy after having suddenly retired. The changing circumstances of my life complicated the way in which I was able to engage with the program. Too many things changing too quickly. I struggled to remain consistent (EG47).<br>In my case I had bad hip pain, which made it hard to complete the program (EG37).<br>Could not get enthusiastic about regimented artificial exercise. Considering that I am physically capable of doing everything I need to do, I have not been able to find the necessary enthusiasm for this program. This may not always be the case though and I would welcome the chance to become re-involved if and when I require help in the future (EG41). |
| Needed more support                                  | No threat of punishment for not doing exercises (EG10).                                                                                                                                                                                                                                                                                                                                                                                                                                                                                                                                                                                                                                                                    |
| Time consuming                                       | Were too time consuming with all the breaks I needed to take (EG13).                                                                                                                                                                                                                                                                                                                                                                                                                                                                                                                                                                                                                                                       |

**Table S3.** Written thoughts for improvement feedback from *ExerciseGuide* intervention.

| Theme                                        | Participant quotes                                                                                                                                                                                                                                                                                                                                                                                                                                         |
|----------------------------------------------|------------------------------------------------------------------------------------------------------------------------------------------------------------------------------------------------------------------------------------------------------------------------------------------------------------------------------------------------------------------------------------------------------------------------------------------------------------|
| Increased exercise variety                   | Auto generate multiple programs for diversity (EG10).<br>Increase the range of exercises i.e.: above head extension and other muscle groups, these could be in a section for an ongoing programme (EG39).<br>May be vary the exercise program (EG30).<br>More back/core strengthening exercises (so it's easier to get up off the floor) (EG50).                                                                                                           |
| Increased support from exercise physiologist | I feel I would have benefited from more supervision/oversight (EG47).<br>Possibly a more regular contact with an exercise physiologist would enable slackers like me to adhere to the schedule a bit (EG30).<br>Provide more follow up telephone calls (EG53).                                                                                                                                                                                             |
| Ability to manipulate exercise program       | I had to change my exercises due to some physical limitations (after week 4). However, the new exercises could not be incorporated in the online version of the program (EG30).<br>Clearer explanation of outcomes would be useful together with explanations of alternatives (EG48).<br>A trial initially to see which work for me, and how many repeats before setting a target program (EG13).<br>The ability to alter the exercise to suit you (EG40). |
| Usability concerns                           | A web or phone app to track your exercise progress (EG10).                                                                                                                                                                                                                                                                                                                                                                                                 |
| IT literacy                                  | I had some minor technical glitches - when printing all the pages of the exercise program in weeks 4-8, the detailed exercise plan is truncated on the right-hand edge (EG20).<br>Software needs an update, there were inconsistencies between my responses and what the program (EG39).                                                                                                                                                                   |
| Increased socialisation                      | Maybe provide an opportunity for participants to meet in a social environment (EG55).                                                                                                                                                                                                                                                                                                                                                                      |
| Improved usability                           | The rubber bands were awkward to use (EG13).<br>Need a video to follow with music (EG13).                                                                                                                                                                                                                                                                                                                                                                  |

**Table S4.** Nonserious adverse events self-reported during *ExerciseGuide* intervention.

| Nonserious adverse events                            | Grade 1 <sup>1</sup> | Grade 2 <sup>2</sup> | Grade 3 <sup>3</sup> | Grade 4 <sup>4</sup> | Grade 5 <sup>5</sup> | Total |
|------------------------------------------------------|----------------------|----------------------|----------------------|----------------------|----------------------|-------|
| Total adverse events, n                              | 26                   | 6                    | 0                    | 0                    | 0                    | 32    |
| Adverse events related to pre-existing conditions, n | 14                   | 6                    | 0                    | 0                    | 0                    | 20    |
| Study-related adverse events, n                      | 12                   | 0                    | 0                    | 0                    | 0                    | 12    |

| Specific Adverse Events, n |               | Grade 1 |    | Grade 2 |    | Grade 3 |    | Grade 4 |    | Grade 5 |    | Total |    |
|----------------------------|---------------|---------|----|---------|----|---------|----|---------|----|---------|----|-------|----|
|                            |               | AT      | RT | AT    | RT |
| Joint or bone pain         | Pre-existing  | 1       | 2  | 1       | 1  | 0       | 0  | 0       | 0  | 0       | 0  | 2     | 3  |
|                            | Study related | 2       | 1  | 0       | 0  | 0       | 0  | 0       | 0  | 0       | 0  | 2     | 1  |
| Muscle pain or injury      | Pre-existing  | 3       | 2  | 1       | 1  | 0       | 0  | 0       | 0  | 0       | 0  | 4     | 3  |
|                            | Study related | 7       | 4  | 0       | 0  | 0       | 0  | 0       | 0  | 0       | 0  | 7     | 4  |
| Fatigue                    | Pre-existing  | 2       | 2  | 1       | 1  | 0       | 0  | 0       | 0  | 0       | 0  | 3     | 3  |
|                            | Study related | 0       | 0  | 0       | 0  | 0       | 0  | 0       | 0  | 0       | 0  | 0     | 0  |

<sup>1</sup> Grade 1 Mild; asymptomatic or mild symptoms; clinical or diagnostic observations only; intervention not indicated. <sup>2</sup> Grade 2 Moderate; minimal, local or noninvasive intervention indicated; limiting age-appropriate instrumental ADL\*. <sup>3</sup> Grade 3 Severe or medically significant but not immediately life-threatening; hospitalization or prolongation of hospitalization indicated. <sup>4</sup> Grade 4 Life-threatening consequences; urgent intervention indicated. <sup>5</sup> Grade 5 Death related to AE. Abbreviations: n = number; AT = aerobic training; RT = resistance training.

**Table S5.** Resistance exercise prescribed within the *ExerciseGuide* intervention.

| Mode                                       | Region     | Exercise                       | Exercise Plan 1                           | Exercise Plan 2                        |
|--------------------------------------------|------------|--------------------------------|-------------------------------------------|----------------------------------------|
|                                            |            |                                | Total number of times prescribed<br>N (%) | Total number of times prescribed N (%) |
| Prescribed by <i>ExerciseGuide</i> website | Upper Limb | Seated Chest Press             | 3 (15%)                                   | 1 (5%)                                 |
|                                            |            | Seated Bicep Curl              | 6 (30%)                                   | 5 (25%)                                |
|                                            |            | Seated Row                     | 7 (35%)                                   | 5 (25%)                                |
|                                            |            | Seated Shoulder Press          | 0 (0%)                                    | 0 (0%)                                 |
|                                            |            | Seated Shoulder Raise          | 0 (0%)                                    | 0 (0%)                                 |
|                                            |            | Seated Triceps Extension       | 10 (50%)                                  | 8 (40%)                                |
|                                            |            | Standing bicep curl            | 7 (35%)                                   | 6 (30%)                                |
|                                            |            | Standing Row                   | 2 (10%)                                   | 0 (0%)                                 |
|                                            |            | Standing Shoulder Press        | 0 (0%)                                    | 0 (0%)                                 |
|                                            |            | Standing Shoulder Raise        | 0 (0%)                                    | 0 (0%)                                 |
|                                            |            | Incline Push Up                | 8 (40%)                                   | 4 (20%)                                |
|                                            | Trunk      | Seated March                   | 10 (50%)                                  | 8 (40%)                                |
|                                            |            | Leg Fallout                    | 4 (20%)                                   | 3 (15%)                                |
|                                            |            | Single Leg Lift                | 3 (15%)                                   | 2 (10%)                                |
|                                            |            | Single Leg Lift with Extension | 4 (20%)                                   | 3 (15%)                                |
|                                            |            | Double Leg Lift                | 2 (10%)                                   | 0 (0%)                                 |
|                                            |            | Double Leg Hip Lift            | 5 (25%)                                   | 2 (10%)                                |
|                                            |            | All Fours                      | 0 (0%)                                    | 1 (5%)                                 |
|                                            |            | All Fours Progression          | 0 (0%)                                    | 0 (0%)                                 |
|                                            | Lower Limb | Seated Knee Extension          | 7 (35%)                                   | 5 (25%)                                |
|                                            |            | Seated Hamstring Curl          | 11 (55%)                                  | 8 (40%)                                |
|                                            |            | Sit to stand                   | 0 (0%)                                    | 0 (0%)                                 |
|                                            |            | Partial Squat                  | 6 (30%)                                   | 4 (20%)                                |
|                                            |            | Squat                          | 2 (10%)                                   | 0 (0%)                                 |
| Added in during telehealth consult         | Upper limb | Seated row                     | 1 (5%)                                    | 1 (5%)                                 |
|                                            | Lower Limb | Wall sit                       | 0 (0%)                                    | 2 (10%)                                |
|                                            |            | Isometric leg extension        | 0 (0%)                                    | 1 (5%)                                 |
|                                            |            | Seated knee extension          | 1 (5%)                                    | 1 (5%)                                 |
|                                            |            | Seated hamstring curl          | 1 (5%)                                    | 1 (5%)                                 |

**Table S6.** Aerobic exercise prescribed and completed within the *ExerciseGuide* intervention.

| Mode                            | Exercise Plan 1    | Exercise Plan 2                 |
|---------------------------------|--------------------|---------------------------------|
|                                 | Week 1-3<br>(N=20) | Week 4-8<br>(N=19) <sup>1</sup> |
| Any option (no bone metastases) | 7 (35%)            | 3 (16%)                         |

|                                        |                           |          |          |
|----------------------------------------|---------------------------|----------|----------|
| Primary mode prescribed by website     | Water walking             | 7 (35%)  | 6 (32%)  |
|                                        | Stationary cycling        | 4 (20%)  | 2 (11%)  |
|                                        | Walking                   | 2 (10%)  | 2 (11%)  |
|                                        | No prescription           | 0 (0%)   | 6 (32%)  |
| Secondary mode/s prescribed by website | Water walking             | 3 (15%)  | 1 (5%)   |
|                                        | Stationary cycling        | 9 (45%)  | 8 (42%)  |
|                                        | Walking                   | 8 (40%)  | 6 (32%)  |
|                                        | Elliptical/climber        | 2 (10%)  | 2 (11%)  |
| Actual aerobic prescription completed  | Walking                   | 12 (60%) | 10 (53%) |
|                                        | Stationary cycling        | 4 (20%)  | 4 (21%)  |
|                                        | Pool Walking              | 2 (10%)  | 1 (5%)   |
|                                        | Water aerobics            | 1 (5%)   | 1 (5%)   |
|                                        | Jogging                   | 1 (5%)   | 1 (5%)   |
|                                        | Cross-trainer             | 1 (5%)   | 1 (5%)   |
|                                        | No prescription completed | 4 (20%)  | 5 (26%)  |

<sup>1</sup> One participant withdrew prior to week 4 and was not prescribed an updated program (exercise plan 2).

**Table S7.** Flexibility exercise prescribed within the *ExerciseGuide* intervention.

|                                |                              | Exercise Plan 1<br>Week 1-3<br>(N=20) | Exercise Plan 2<br>Week 4-8<br>(N=19) <sup>1</sup> |
|--------------------------------|------------------------------|---------------------------------------|----------------------------------------------------|
| Stretching program             | Stretching program requested | 19 (95%)                              | 7 (37%)                                            |
| Number of stretches prescribed | Mean $\pm$ SD                | 4.8 $\pm$ 2.3                         | 4.3 $\pm$ 2.8                                      |
| Stretches prescribed           | Triceps                      | 17 (85%)                              | 6 (32%)                                            |
|                                | Chest                        | 17 (85%)                              | 6 (32%)                                            |
|                                | Quads                        | 11 (55%)                              | 6 (32%)                                            |
|                                | Glutes                       | 7 (35%)                               | 2 (11%)                                            |
|                                | Groin                        | 11 (55%)                              | 6 (32%)                                            |
|                                | Hamstring                    | 11 (55%)                              | 6 (32%)                                            |
|                                | Calf                         | 18 (90%)                              | 7 (37%)                                            |

**Table S8.** Subgroup physical functioning measures at baseline and follow up (N=10).

| Outcome                  | Baseline                   |                            | Follow-up                  |                            | Adjusted Change<br>Mean difference (95% CI) | P-Value |
|--------------------------|----------------------------|----------------------------|----------------------------|----------------------------|---------------------------------------------|---------|
|                          | EG                         | CON                        | EG                         | CON                        |                                             |         |
| 400m walk (min)          | 5.49 $\pm$ 1.52<br>(N=5)   | 4.53 $\pm$ 1.36<br>(N=4)   | 5.23 $\pm$ 2.02<br>(N=5)   | 4.80 $\pm$ 1.94<br>(N=4)   | -0.8 (-1.5 – -0.1)                          | 0.02*   |
| Timed up and go (s)      | 9.72 $\pm$ 3.04<br>(N=6)   | 7.10 $\pm$ 3.83<br>(N=4)   | 8.64 $\pm$ 3.08<br>(N=6)   | 7.29 $\pm$ 3.84<br>(N=4)   | -1.0 (-2.5 – 0.5)                           | 0.15    |
| Repeated chair stand (s) | 16.93 $\pm$ 7.05<br>(N=6)  | 13.30 $\pm$ 4.58<br>(N=4)  | 16.07 $\pm$ 6.00<br>(N=6)  | 13.22 $\pm$ 4.76<br>(N=5)  | -0.7 (-2.1 – 0.6)                           | 0.22    |
| 1RM – Chest press (kg)   | 58.75 $\pm$ 14.36<br>(N=5) | 56.67 $\pm$ 11.55<br>(N=3) | 65.00 $\pm$ 16.83<br>(N=5) | 56.67 $\pm$ 11.55<br>(N=3) | 8.5 (0.9 – 16.0)                            | 0.04*   |
| 1RM – Leg extension (kg) | 57.5 $\pm$ 25.0<br>(N=5)   | 50.0 $\pm$ 10.0<br>(N=4)   | 63.13 $\pm$ 21.35<br>(N=5) | 53.3 $\pm$ 20.21<br>(N=4)  | 2.5 (-25.3 – 30.3)                          | 0.82    |
